Erratum

## Functional divergence between *eyeless* and *twin of eyeless* in *Drosophila melanogaster*

Claudio Punzo, Serge Plaza, Makiko Seimiya, Pamela Schnupf, Shoichiro Kurata, Johannes Jaeger and Walter J. Gehring  
*Development* **131**, 3943-3953.

The first online version of this manuscript, which was published on July 14, contained the following error.

In the Summary, the full name for the gene *sey* was given as *scratched eyes*. This was incorrect. The full name is *small eyes*.

This error was corrected in the second online version, published on July 21. The final online version and the print version are correct.

We apologise to the authors and readers for this mistake.
